# Supplementary material
Source: PubMed Central journal article supplement (PMC4592856)
Supplement: AEM.01583-15_zam999116673so1.pdf [file AEM.01583-15_zam999116673so1.pdf]

**TABLE S1. Primers used to quantify total and different methanogen groups from the Everglades soil DNAs**

| Target methanogen          | Primer <sup>a</sup> /probe | Primer sequence (5'-3')                                                                                        | Tm <sup>b</sup> | Reference                               |
|----------------------------|----------------------------|----------------------------------------------------------------------------------------------------------------|-----------------|-----------------------------------------|
| Total methanogens          | mlas (F)                   | GGT GGT GTM GGD TTC ACM CAR TA                                                                                 | 58.5            | Steinberg and Regan (2009) <sup>1</sup> |
| Total methanogens          | mcrA-rev (R)               | CGT TCA TBG CGT AGT TVG GRT AGT                                                                                | 58.8            | Steinberg and Regan (2009)              |
| <i>Methanomicrobiales</i>  | MM-F (F)                   | AAR TAC AAR GTY GAC TGG MRR RAC                                                                                | 56.2            | This study                              |
| <i>Methanosaetaceae</i>    | MST-F (F)                  | CAA GTW <u>Y</u> <sup>c</sup> GG MGG ATT <u>C</u> GC CAA GG                                                    | 60.4            | This study                              |
|                            | msa (Probe)                | CAA GTW CGG MGG ATT YGC CAA GG                                                                                 | 60.5            | Steinberg and Regan (2009)              |
| <i>Methanobacteriaceae</i> | MB_F (F)                   | <u>A</u> AG CAC <u>C</u> <u>W</u> <u>A</u> ACA MCA TGG <u>A</u> <u>H</u> <u>A</u> <u>C</u> <u>H</u> <u>G</u> T | 59.3            | This study                              |
|                            | mabac (Probe)              | ARG CAC CKA ACA MCA TGG ACA CWG T                                                                              | 61.6            | Steinberg and Regan (2009)              |

<sup>a</sup>F, forward primer; R, reverse primer.

<sup>b</sup>Tm, melting temperature of primer, which was determined in the online calculation with OligoAnalyzer 3.1 at Integrated DNA Technologies (<https://www.idtdna.com/site>).

<sup>c</sup>The different nucleotide between our primer and Steinberg and Regan's probes was underlined.

**TABLE S2. Primer used to quantify total and different methanogen groups from the Everglades soil DNA**

| Combination     | Target microbial groups    | Standard curves |             |        | Efficiency (%) | Reference for primer sequence           |
|-----------------|----------------------------|-----------------|-------------|--------|----------------|-----------------------------------------|
|                 |                            | Slope           | y intercept | $R^2$  |                |                                         |
| mlas/mcrA-Rev   | Total methanogens          | -3.464          | 32.76       | 0.9996 | 94.5           | Steinberg and Regan (2009) <sup>1</sup> |
| MM-F/mcrA-Rev   | <i>Methanomicrobiales</i>  | -3.491          | 32.30       | 0.9984 | 93.4           | this study                              |
| MST-FmcrA-Rev   | <i>Methanosaetaceae</i>    | -3.433          | 32.69       | 0.9968 | 95.5           | this study                              |
| MB-F/MCRA-Rev   | <i>Methanobacteriaceae</i> | -3.403          | 32.20       | 0.9995 | 96.7           | this study                              |
| DSRp2060F/DSR4R | Sulfate reducers           | -4.4496         | 38.07       | 0.9998 | 94.9           | Foti et al. (2007) <sup>2</sup>         |

Bae et al. 2015

**TABLE S3.** Diversity measurements of gene *mcrA* based on OTUs generated from deduced amino acid sequences of these gene and transcripts retrieved from the WCA-2A of Everglades.

| Gene        | Study site | Clone no. screened | Cutoff % on deduced amino acid sequences | No. of OTUs | Chao1 richness (CI) <sup>a</sup> | Shannon diversity (CI) | Coverage (%) |
|-------------|------------|--------------------|------------------------------------------|-------------|----------------------------------|------------------------|--------------|
| <i>mcrA</i> | F1         | 86                 | 5%                                       | 41          | 74 (53, 131)                     | 3.4 (3.1, 3.6)         | 71           |
|             |            |                    | 10%                                      | 31          | 39 (33, 60)                      | 3.1 (2.9, 3.3)         | 85           |
|             |            |                    | 15%                                      | 24          | 30 (25, 51)                      | 2.8 (2.6, 2.9)         | 89           |
|             |            |                    | 20%                                      | 12          | 22 (18, 49)                      | 2.5 (2.3, 2.7)         | 94           |
|             | F4         | 82                 | 5%                                       | 38          | 71 (49, 133)                     | 3.3 (3.1, 3.5)         | 73           |
|             |            |                    | 10%                                      | 25          | 31 (26, 52)                      | 2.9 (2.7, 3.1)         | 89           |
|             |            |                    | 14%                                      | 18          | 19 (18, 26)                      | 2.6 (3.6, 3.9)         | 96           |
|             |            |                    | 20%                                      | 12          | 12 (12, 0)                       | 2.1 (1.9, 2.3)         | 99           |
|             | U3         | 87                 | 5%                                       | 42          | 58 (47, 89)                      | 3.6 (3.4, 3.7)         | 78           |
|             |            |                    | 10%                                      | 33          | 44 (36, 73)                      | 3.3 (3.1, 3.4)         | 85           |
|             |            |                    | 15%                                      | 25          | 28 (25, 40)                      | 3.0 (2.9, 3.2)         | 93           |
|             |            |                    | 19%                                      | 18          | 19 (18, 25)                      | 2.7 (2.5, 2.8)         | 97           |

<sup>a</sup>95% confidence interval.

TABLE S4. Composition of *mcrA* and phylogenetic affiliation of OTUs with known sequences

| Study site |    |    | Sum | Representative<br>OUT | (sub)Cluster I.D. | Strains closely related (accession number)                  | Inferred phylogeny     |                           |                            |
|------------|----|----|-----|-----------------------|-------------------|-------------------------------------------------------------|------------------------|---------------------------|----------------------------|
| F1         | F4 | U3 |     |                       |                   |                                                             | Class                  | Order                     | Family                     |
| 5          | 1  | 0  | 6   | F1-F04                | MM-I              | <i>Methanomicrobium mobile</i> BP DSM 1539 (AAL29293)       | <i>Methanomicrobia</i> | <i>Methanomicrobiales</i> | <i>Methanomicrobiaceae</i> |
| 2          | 0  | 2  | 4   | U3-H06                | MM-I              | <i>Methanocorpusculum bavaricum</i> DSM 4179 (AAL29298)     | <i>Methanomicrobia</i> | <i>Methanomicrobiales</i> | <i>Methanomicrobiaceae</i> |
| 0          | 0  | 2  | 2   | U3-E08                | MM-I              | <i>Methanocorpusculum labreanum</i> Z (ABN07725)            | <i>Methanomicrobia</i> | <i>Methanomicrobiales</i> | <i>Methanomicrobiaceae</i> |
| 1          | 0  | 0  | 1   | F1-C11                | MM-I              | <i>Methanocorpusculum parvum</i> DSM 3823 (AAL29294)        | <i>Methanomicrobia</i> | <i>Methanomicrobiales</i> | <i>Methanomicrobiaceae</i> |
| 0          | 1  | 0  | 1   | F4-A09                | MM-I              |                                                             |                        |                           |                            |
| 0          | 0  | 2  | 2   | U3-D09                | MM-I              |                                                             |                        |                           |                            |
| 1          | 0  | 0  | 1   | F1-G01                | MM-I              |                                                             |                        |                           |                            |
| 1          | 0  | 0  | 1   | F1-C07                | MM-I              |                                                             |                        |                           |                            |
| 0          | 1  | 0  | 1   | F4-G06                | MM-I              |                                                             |                        |                           |                            |
| 0          | 3  | 0  | 3   | F4-H02                | MM-II             | <i>Methanoplanus petrolearius</i> DSM 11571 (ADN36741)      | <i>Methanomicrobia</i> | <i>Methanomicrobiales</i> | <i>Methanomicrobiaceae</i> |
| 0          | 1  | 0  | 1   | F4-H09                | MM-II             | <i>Methanoculleus marisnigri</i> JR1 (ABNS6546)             | <i>Methanomicrobia</i> | <i>Methanomicrobiales</i> | <i>Methanomicrobiaceae</i> |
| 0          | 2  | 0  | 2   | F4-B05                | MM-II             |                                                             |                        |                           |                            |
| 0          | 1  | 0  | 1   | F4-A12                | MM-II             |                                                             |                        |                           |                            |
| 1          | 5  | 0  | 6   | F4-D02                | MM-II             |                                                             |                        |                           |                            |
| 0          | 1  | 0  | 1   | F4-H10                | MM-II             |                                                             |                        |                           |                            |
| 0          | 1  | 0  | 1   | F4-B10                | MM-II             |                                                             |                        |                           |                            |
| 0          | 1  | 1  | 2   | U3-G01                | MM-II             |                                                             |                        |                           |                            |
| 1          | 0  | 0  | 1   | F1-B10                | MM-II             |                                                             |                        |                           |                            |
| 0          | 3  | 0  | 3   | F4-G10                | MM-II             |                                                             |                        |                           |                            |
| 3          | 1  | 0  | 4   | F4-B03                | MM-II             |                                                             |                        |                           |                            |
| 0          | 1  | 0  | 1   | F4-F04                | MM-II             |                                                             |                        |                           |                            |
| 3          | 4  | 0  | 7   | F4-B08                | MM-II             |                                                             |                        |                           |                            |
| 0          | 0  | 1  | 1   | U3-D04                | MM-II             |                                                             |                        |                           |                            |
| 8          | 9  | 3  | 20  | F4-F08                | MM-II             |                                                             |                        |                           |                            |
| 0          | 0  | 7  | 7   | U3-H08                | MM-III            | No reference sequences included                             |                        |                           |                            |
| 0          | 0  | 1  | 1   | U3-F12                | MM-III            |                                                             |                        |                           |                            |
| 0          | 0  | 1  | 1   | U3-G09                | MM-IV             | No reference sequences included                             |                        |                           |                            |
| 7          | 6  | 2  | 15  | F1-B07                | MM-IV             |                                                             |                        |                           |                            |
| 2          | 2  | 0  | 4   | F4-H01                | MM-IV             |                                                             |                        |                           |                            |
| 1          | 0  | 0  | 1   | F1-G05                | MM-IV             |                                                             |                        |                           |                            |
| 1          | 0  | 0  | 1   | F1-E03                | MM-IV             |                                                             |                        |                           |                            |
| 2          | 2  | 0  | 4   | F1-H08                | MM-IV             |                                                             |                        |                           |                            |
| 0          | 1  | 0  | 1   | F4-D03                | MM-IV             |                                                             |                        |                           |                            |
| 1          | 0  | 0  | 1   | F1-E05                | MM-V              | <i>Methanolinea tarda</i> NOBI-1 (EHF09948)                 | <i>Methanomicrobia</i> | <i>Methanomicrobiales</i> | <i>Methanoregulaceae</i>   |
| 0          | 1  | 0  | 1   | F4-F03                | MM-V              |                                                             |                        |                           |                            |
| 1          | 1  | 4  | 6   | U3-E04                | MM-V              |                                                             |                        |                           |                            |
| 1          | 0  | 2  | 3   | F1-G08                | MM-V              |                                                             |                        |                           |                            |
| 0          | 1  | 2  | 3   | U3-F07                | MM-V              |                                                             |                        |                           |                            |
| 0          | 1  | 0  | 1   | F4-H04                | MM-V              |                                                             |                        |                           |                            |
| 1          | 0  | 3  | 4   | U3-A03                | MM-VI             | No reference sequences included                             |                        |                           |                            |
| 0          | 0  | 3  | 3   | U3-H01                | MM-VI             |                                                             |                        |                           |                            |
| 0          | 0  | 1  | 1   | U3-B02                | MM-VI             |                                                             |                        |                           |                            |
| 0          | 2  | 0  | 2   | F4-C03                | MM-VI             |                                                             |                        |                           |                            |
| 2          | 0  | 0  | 2   | F1-D12                | MM-VII            | <i>Methanoregula boonei</i> 6A8 (ABS55100)                  | <i>Methanomicrobia</i> | <i>Methanomicrobiales</i> | <i>Methanoregulaceae</i>   |
| 0          | 0  | 4  | 4   | U3-E07                | MM-VII            |                                                             |                        |                           |                            |
| 1          | 0  | 0  | 1   | F1-A08                | MM-VII            |                                                             |                        |                           |                            |
| 1          | 0  | 0  | 1   | F1-D10                | MM-VII            |                                                             |                        |                           |                            |
| 0          | 0  | 1  | 1   | U3-F05                | MM-VII            |                                                             |                        |                           |                            |
| 0          | 0  | 1  | 1   | U3-B03                | MM-VII            |                                                             |                        |                           |                            |
| 1          | 0  | 0  | 1   | F1-G04                | MM-VII            |                                                             |                        |                           |                            |
| 8          | 8  | 2  | 18  | F1-B11                | MST-I             | <i>Methanoseta harundinacea</i> 6Ac (ADQ42341)              | <i>Methanomicrobia</i> | <i>Methanosarcinales</i>  | <i>Methanosetaeaceae</i>   |
| 1          | 1  | 0  | 2   | F4-D06                | MST-I             | <i>Methanoseta thermophila</i> PT (ABK14360)                | <i>Methanomicrobia</i> | <i>Methanosarcinales</i>  | <i>Methanosetaeaceae</i>   |
| 0          | 0  | 1  | 1   | U3-C07                | MST-I             |                                                             |                        |                           |                            |
| 0          | 2  | 0  | 2   | F4-B06                | MST-I             |                                                             |                        |                           |                            |
| 0          | 0  | 1  | 1   | U3-C12                | MST-I             |                                                             |                        |                           |                            |
| 0          | 0  | 3  | 3   | U3-D01                | MST_II            | <i>Methanoseta concilii</i> DSM 3671 (AAK16832)             | <i>Methanomicrobia</i> | <i>Methanosarcinales</i>  | <i>Methanosetaeaceae</i>   |
| 1          | 1  | 0  | 2   | F4-B09                | MST_II            | <i>Methanoseta concilii</i> VeAc9 (AAK16833)                | <i>Methanomicrobia</i> | <i>Methanosarcinales</i>  | <i>Methanosetaeaceae</i>   |
| 0          | 1  | 0  | 1   | F4-C02                | MST_II            |                                                             |                        |                           |                            |
| 1          | 0  | 0  | 1   | F1-A04                | MST_II            |                                                             |                        |                           |                            |
| 0          | 1  | 0  | 1   | F4-G05                | MST_II            |                                                             |                        |                           |                            |
| 0          | 0  | 1  | 1   | U3-D11                | MST_II            |                                                             |                        |                           |                            |
| 0          | 0  | 2  | 2   | U3-F10                | MST_II            |                                                             |                        |                           |                            |
| 0          | 0  | 1  | 1   | U3-F09                | MST_II            |                                                             |                        |                           |                            |
| 3          | 0  | 0  | 3   | F1-E08                | MST_II            |                                                             |                        |                           |                            |
| 0          | 0  | 4  | 4   | U3-E02                | MST_II            |                                                             |                        |                           |                            |
| 0          | 1  | 0  | 1   | F4-F11                | MST_II            |                                                             |                        |                           |                            |
| 3          | 0  | 0  | 3   | F1-D05                | MST_II            |                                                             |                        |                           |                            |
| 0          | 1  | 0  | 1   | F4-E02                | MST_II            |                                                             |                        |                           |                            |
| 0          | 3  | 0  | 3   | F4-H07                | MST_II            |                                                             |                        |                           |                            |
| 0          | 0  | 2  | 2   | U3-C09                | MST_II            |                                                             |                        |                           |                            |
| 1          | 4  | 0  | 5   | F4-D05                | MST_II            |                                                             |                        |                           |                            |
| 0          | 3  | 0  | 3   | F4-B01                | MST_II            |                                                             |                        |                           |                            |
| 0          | 0  | 1  | 1   | U3-D10                | MSR               | <i>Methanomethylorans hollandica</i> ZB (AAP20897)          | <i>Methanomicrobia</i> | <i>Methanosarcinales</i>  | <i>Methanosarcinaceae</i>  |
| 1          | 0  | 1  | 2   | U3-D05                | MSR               | <i>Methanococcoides burtonii</i> DSM 6242 (ABE53268)        | <i>Methanomicrobia</i> | <i>Methanosarcinales</i>  | <i>Methanosarcinaceae</i>  |
|            |    |    |     |                       |                   | <i>Methanohalophilus evestigatum</i> Z-7303 (ADI73798)      | <i>Methanomicrobia</i> | <i>Methanosarcinales</i>  | <i>Methanosarcinaceae</i>  |
|            |    |    |     |                       |                   | <i>Methanohalophilus mahii</i> DSM 5219 (ADE36137)          | <i>Methanomicrobia</i> | <i>Methanosarcinales</i>  | <i>Methanosarcinaceae</i>  |
|            |    |    |     |                       |                   | <i>Methanosarcina thermophila</i> TM-1 (AAC43426)           | <i>Methanomicrobia</i> | <i>Methanosarcinales</i>  | <i>Methanosarcinaceae</i>  |
|            |    |    |     |                       |                   | <i>Methanosarcina mazaui</i> C16 (AAC43413)                 | <i>Methanomicrobia</i> | <i>Methanosarcinales</i>  | <i>Methanosarcinaceae</i>  |
|            |    |    |     |                       |                   | <i>Methanosarcina acetivorans</i> C2A (AAM07885)            | <i>Methanomicrobia</i> | <i>Methanosarcinales</i>  | <i>Methanosarcinaceae</i>  |
|            |    |    |     |                       |                   | <i>Methanosarcina barkeri</i> Fusaro (CAA68357)             | <i>Methanomicrobia</i> | <i>Methanosarcinales</i>  | <i>Methanosarcinaceae</i>  |
| 2          | 0  | 1  | 3   | U3-A12                | MCEL-I            | <i>Methanocella paludicola</i> SANAÉ (BAI60588)             | <i>Methanomicrobia</i> | <i>Methanocellales</i>    | <i>Methanocellaceae</i>    |
| 0          | 0  | 3  | 3   | U3-C03                | MCEL-I            | <i>Methanocella conradii</i> HZ254 (AEH76000)               | <i>Methanomicrobia</i> | <i>Methanocellales</i>    | <i>Methanocellaceae</i>    |
| 0          | 0  | 1  | 1   | U3-E05                | MCEL-I            |                                                             |                        |                           |                            |
| 1          | 0  | 0  | 1   | F1-D02                | MCEL-II           |                                                             |                        |                           |                            |
| 1          | 0  | 0  | 1   | F1-F08                | MB-I              | <i>Methanobacterium palustre</i> NBRC 105230 (BAI67109)     | <i>Methanobacteria</i> | <i>Methanobacteriales</i> | <i>Methanobacteriaceae</i> |
|            |    |    |     |                       |                   | <i>Methanosphaera stadtmanae</i> DSM 3091 (ABC56731)        | <i>Methanobacteria</i> | <i>Methanobacteriales</i> | <i>Methanobacteriaceae</i> |
|            |    |    |     |                       |                   | <i>Methanobrevibacter smithii</i> ATCC 35061 (ABQ87107)     | <i>Methanobacteria</i> | <i>Methanobacteriales</i> | <i>Methanobacteriaceae</i> |
|            |    |    |     |                       |                   | <i>Methanobacterium ivanovii</i> NBRC 104952 (BAI67108)     | <i>Methanobacteria</i> | <i>Methanobacteriales</i> | <i>Methanobacteriaceae</i> |
| 2          | 0  | 0  | 2   | F1-H12                | MB-II             | <i>Methanobacterium petrolearium</i> Mic5c12 (BAI67093)     | <i>Methanobacteria</i> | <i>Methanobacteriales</i> | <i>Methanobacteriaceae</i> |
| 4          | 2  | 0  | 6   | F4-G09                | MB-II             | <i>Methanobacterium aarhusense</i> H2-LR (AAR27839)         | <i>Methanobacteria</i> | <i>Methanobacteriales</i> | <i>Methanobacteriaceae</i> |
| 2          | 1  | 0  | 3   | F1-C04                | MB-II             | <i>Methanobacterium alcaliphilum</i> NBRC 105226 (BAI67095) | <i>Methanobacteria</i> | <i>Methanobacteriales</i> | <i>Methanobacteriaceae</i> |
| 0          | 0  | 1  | 1   | U3-F06                | MB-II             | <i>Methanobacterium lacus</i> AL-21 (ADZ08605)              | <i>Methanobacteria</i> | <i>Methanobacteriales</i> | <i>Methanobacteriaceae</i> |

|    |    |    |     |        |           |                                                                 |                        |                           |                            |
|----|----|----|-----|--------|-----------|-----------------------------------------------------------------|------------------------|---------------------------|----------------------------|
| 0  | 0  | 2  | 2   | U3-G12 | MB-II     | <i>Methanobacterium bryantii</i> DSM 863 (AAK16836)             | <i>Methanobacteria</i> | <i>Methanobacteriales</i> | <i>Methanobacteriaceae</i> |
| 1  | 0  | 0  | 1   | F1-E07 | MB-II     | <i>Methanothermobacter thermautotrophicus</i> delta H (AAA7344) | <i>Methanobacteria</i> | <i>Methanobacteriales</i> | <i>Methanobacteriaceae</i> |
| 0  | 0  | 3  | 3   | U3-D03 | MB-II     |                                                                 |                        |                           |                            |
| 0  | 0  | 1  | 1   | U3-H09 | MB-II     |                                                                 |                        |                           |                            |
| 2  | 0  | 0  | 2   | F1-F01 | UnEury-I  | No reference sequences included                                 |                        |                           |                            |
| 2  | 0  | 0  | 2   | F1-H09 | UnEury-II | Candidatus <i>Methanomethylophilus alvus</i> Mx1201 (AGI85144)  | <i>Methanobacteria</i> | the seventh order         |                            |
| 0  | 0  | 2  | 2   | U3-H05 | UnEury-II | <i>Methanomassiliicoccus luminyensis</i> B10 (AEO13319)         |                        |                           |                            |
| 1  | 0  | 0  | 1   | U3-B06 | UnEury-II |                                                                 |                        |                           |                            |
| 1  | 0  | 3  | 4   | U3-A08 | UnEury-II |                                                                 |                        |                           |                            |
| 0  | 0  | 1  | 1   | U3-B07 | UnEury-II |                                                                 |                        |                           |                            |
| 0  | 0  | 1  | 1   | U3-F08 | UnEury-II |                                                                 |                        |                           |                            |
| 0  | 0  | 2  | 2   | U3-G08 | UnEury-II |                                                                 |                        |                           |                            |
| 0  | 0  | 4  | 4   | U3-E11 | UnEury-II |                                                                 |                        |                           |                            |
| 86 | 82 | 87 | 255 |        |           |                                                                 |                        |                           |                            |

TABLE S5. Gene copies measured using qPCR from soil samples collected in WCAs of the Everglades.

| Study site | Sampling time  | T-MCRA                 | MM                     | MST                    | MB                     | DsrB                   |
|------------|----------------|------------------------|------------------------|------------------------|------------------------|------------------------|
| F1         | Oct. (2009)    | 1.2E+9(5.1E+8)         | 6.4E+8(3.8E+8)         | 3.4E+8(2.4E+8)         | 2.3E+7(1.2E+7)         | ND                     |
|            | Apr. (2010)    | 1.2E+9(9.4E+8)         | 5.8E+8(4.4E+8)         | 3.0E+8(1.7E+8)         | 6.7E+7(5.1E+7)         | 4.4E+8 (1.6E+8)        |
|            | Aug. (2011)    | 6.5E+8(1.3E+8)         | 1.0E+9(2.6E+8)         | 6.2E+8(1.6E+8)         | 3.9E+7(1.6E+7)         | 1.2E+9 (2.7E+8)        |
|            | Jan. (2012)    | 2.4E+9(9.8E+8)         | 1.3E+9(4.7E+8)         | 9.8E+8(4.7E+8)         | 1.2E+8(5.2E+7)         | 3.5E+9 (1.3E+9)        |
|            | Aug (2012)     | 6.0E+8(1.1E+8)         | 7.1E+8(3.3E+7)         | 4.5E+8(5.4E+7)         | 5.5E+7(2.8E+7)         | 1.1E+9 (2.2E+8)        |
|            | Dec. (2012)    | 6.5E+8(8.9E+7)         | 1.5E+9(1.4E+8)         | 7.2E+8(8.0E+7)         | 6.7E+7(1.4E+7)         | 3.2E+9 (4.0E+8)        |
|            | <b>average</b> | <b>1.1E+9(8.3E+8)</b>  | <b>9.6E+8(4.5E+8)</b>  | <b>5.7E+8(3.1E+8)</b>  | <b>6.2E+7(4.2E+7)</b>  | <b>1.9E+9 (1.4E+9)</b> |
| F4         | Oct. (2009)    | 4.4E+8(2.7E+8)         | 5.2E+8(5.5E+8)         | 2.2E+8(8.5E+8)         | 5.1E+6(3.2E+6)         | ND                     |
|            | Apr. (2010)    | 8.5E+8(4.2E+8)         | 3.8E+8(1.7E+8)         | 1.6E+8(7.4E+7)         | 1.0E+7(8.8E+5)         | 5.1E+8 (1.2E+8)        |
|            | Aug. (2011)    | 6.7E+8(8.5E+7)         | 1.1E+9(3.9E+8)         | 5.5E+8(8.1E+7)         | 2.6E+7(7.0E+6)         | 1.1E+9 (6.8E+7)        |
|            | Jan. (2012)    | 2.1E+9(4.8E+8)         | 9.3E+8(1.5E+8)         | 9.6E+8(2.6E+8)         | 1.9E+8(8.4E+7)         | 3.5E+9 (1.0E+9)        |
|            | Aug (2012)     | 3.8E+8(8.0E+7)         | 2.3E+8(8.1E+7)         | 3.3E+8(1.0E+8)         | 1.1E+7(3.8E+6)         | 7.6E+8 (1.6E+8)        |
|            | Dec. (2012)    | 6.4E+8(2.2E+8)         | 8.7E+8(2.9E+7)         | 3.6E+8(9.7E+7)         | 2.0E+7(9.2E+6)         | 1.8E+9 (6.2E+8)        |
|            | <b>average</b> | <b>8.4E+8(6.4E+8)</b>  | <b>6.8E+8(4.2E+8)</b>  | <b>4.3E+8(3.0E+8)</b>  | <b>4.4E+7(7.3E+6)</b>  | <b>1.5E+9 (1.2E+9)</b> |
| U3         | Oct. (2009)    | 1.5E+9(2.2E+9)         | 8.9E+7(4.5E+7)         | 1.0E+8(1.3E+8)         | 1.6E+7(2.5E+7)         | ND                     |
|            | Apr. (2010)    | 2.4E+8(1.6E+8)         | 1.3E+8(1.0E+8)         | 7.8E+7(4.1E+7)         | 7.2E+6(2.3E+6)         | 2.4E+8 (9.7E+7)        |
|            | Aug. (2011)    | 2.4E+8(7.5E+7)         | 2.1E+8(1.2E+8)         | 1.8E+8(4.7E+7)         | 9.1E+6(5.4E+6)         | 4.4E+8 (6.4E+7)        |
|            | Jan. (2012)    | 8.7E+8(2.2E+8)         | 5.0E+8(1.3E+8)         | 3.5E+8(9.5E+7)         | 1.9E+7(3.3E+6)         | 1.4E+9 (3.1E+8)        |
|            | Aug (2012)     | 2.9E+8(9.0E+7)         | 2.2E+8(5.3E+7)         | 1.5E+8(5.7E+7)         | 8.6E+6(6.2E+6)         | 3.8E+8 (5.2E+7)        |
|            | Dec. (2012)    | 1.0E+8(6.1E+7)         | 1.5E+8(7.2E+7)         | 1.5E+8(7.0E+7)         | 8.2E+6(3.6E+6)         | 8.5E+8 (4.1E+8)        |
|            | <b>average</b> | <b>5.3E+8(9.1E+8)</b>  | <b>2.2E+8(1.6E+7)</b>  | <b>1.7E+8(1.1E+8)</b>  | <b>1.1E+7(1.0E+7)</b>  | <b>6.7E+8 (4.9E+8)</b> |
| W3         | Feb. (2012)    | 2.9E+7 (1.9E+7)        | 2.5E+7 (3.6E+6)        | 3.4E+7 (2.3E+7)        | 6.3E+6 (3.2E+6)        | 9.5E+7 (6.6E+7)        |
|            | Mar. (2013)    | 6.4E+7 (6.6E+7)        | 4.0E+7 (2.6E+7)        | 5.1E+7 (2.9E+7)        | 1.8E+7 (1.5E+7)        | 7.6E+7 (4.2E+7)        |
|            | Apr. (2013)    | 1.2E+8 (4.1E+7)        | 3.0E+7 (5.3E+6)        | 8.6E+7 (1.4E+7)        | 1.9E+7 (8.3E+6)        | 8.6E+7 (1.5E+7)        |
|            | <b>average</b> | <b>9.8E+7 (6.0E+7)</b> | <b>1.9E+7 (1.7E+7)</b> | <b>7.6E+7 (2.3E+7)</b> | <b>1.4E+7 (1.0E+7)</b> | <b>8.6E+7 (4.1E+7)</b> |

ND, Not determined

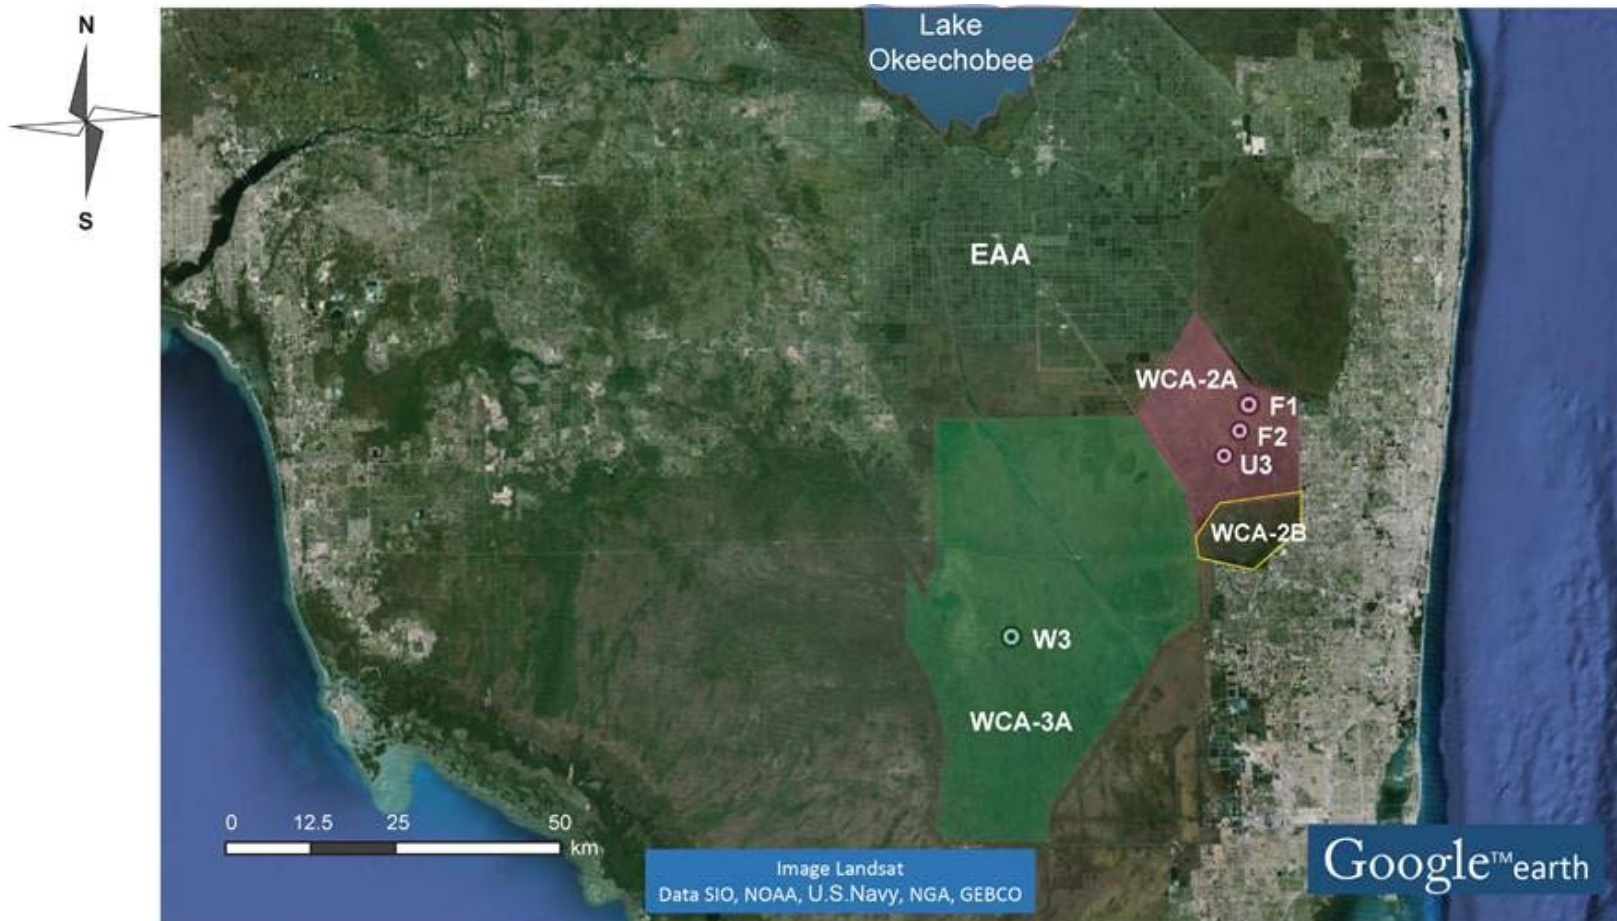

**FIG. S1.** Study sites F1, F4, U3 and W3 within the Everglades Conservation Areas.







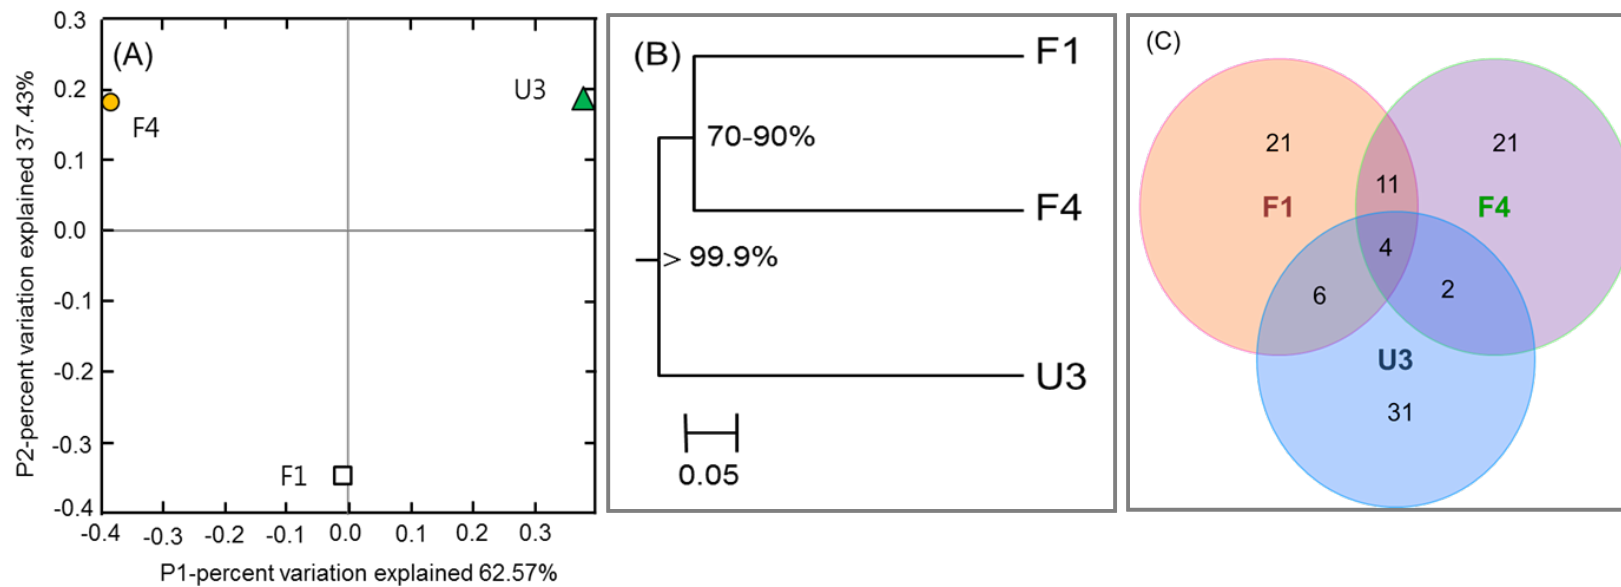

**FIG. S3.** Distribution of methanogen communities determined by McrA in F1, F4, U3 of the Everglades Water Conservation Areas. (A) Unweighted PCoA plot and (B) Dendrogram with Jackknif values cluster, and (C) Venn diagram showing the shared number of OTUs between sites.

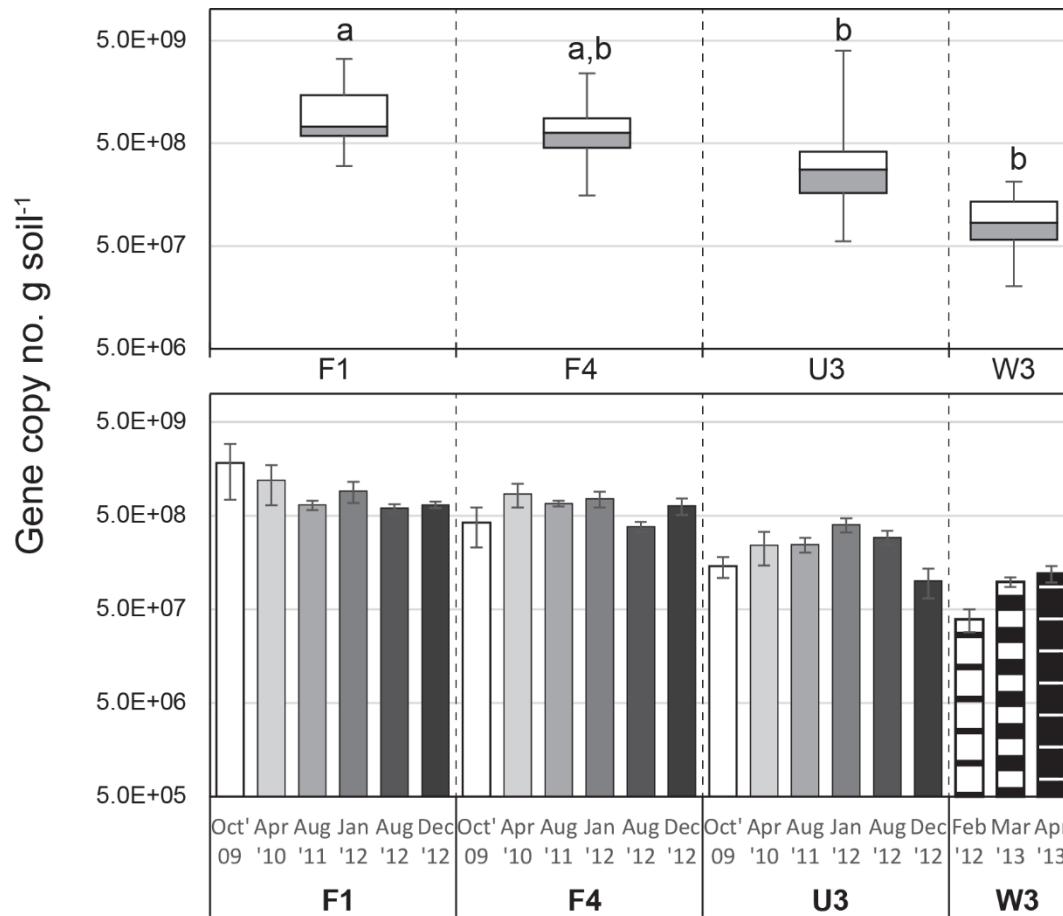

FIG. S4. Box and Whisker plot (upper) and temporal profiles (lower) of the *mcrA* copies for total methanogens measured in the soil samples collected from sties F1, F4, U3 and W3 from October 2009 to April 2013. Error bars in temporal profiles within each site represent +/- 1 SE from 3 soil cores. Box and Whisker plot was constructed based on pooled data from the temporal measurements within each site. Boxes depict the medians (horizontal lines) and the lower and upper quartiles (bottoms and tops of boxes). The vertical bars (whiskers) show the highest and the lowest values, excluding outliers. Lower case letters on each box represent the difference obtained from comparisons for all pairs of sites: similar letters indicate no significant difference; different letters indicate a significant difference ( $P < 0.05$  in Tukey-Kramer HSD test).

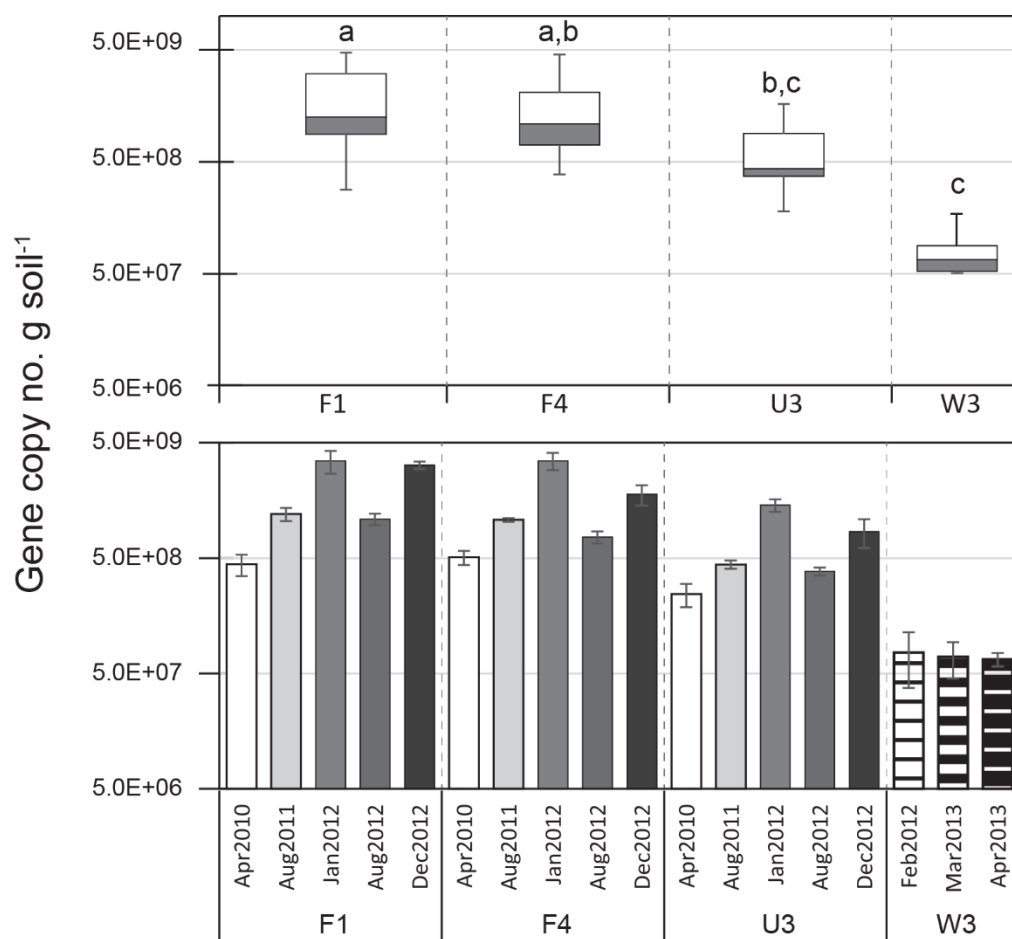

FIG. S5. Box and Whisker plot (upper) and temporal profiles (lower) of the *dsrB* copies measured in the soil samples collected from sties F1, F4, U3 and W3 from April 2010 to April 2013. Error bars in temporal profiles represent  $\pm 1$  SE from 3 soil cores. Box and Whisker plot was constructed from the pooled data of temporal measurements within each site. Boxes depict the medians (horizontal lines) and the lower and upper quartiles (bottoms and tops of boxes). The vertical bars (whiskers) show the highest and the lowest values, excluding outliers. Lower case letters on each box represent the difference obtained from comparisons for all pairs of sites: similar letters indicate no significant difference; different letters indicate a significant difference ( $P < 0.05$  in Tukey-Kramer HSD test).

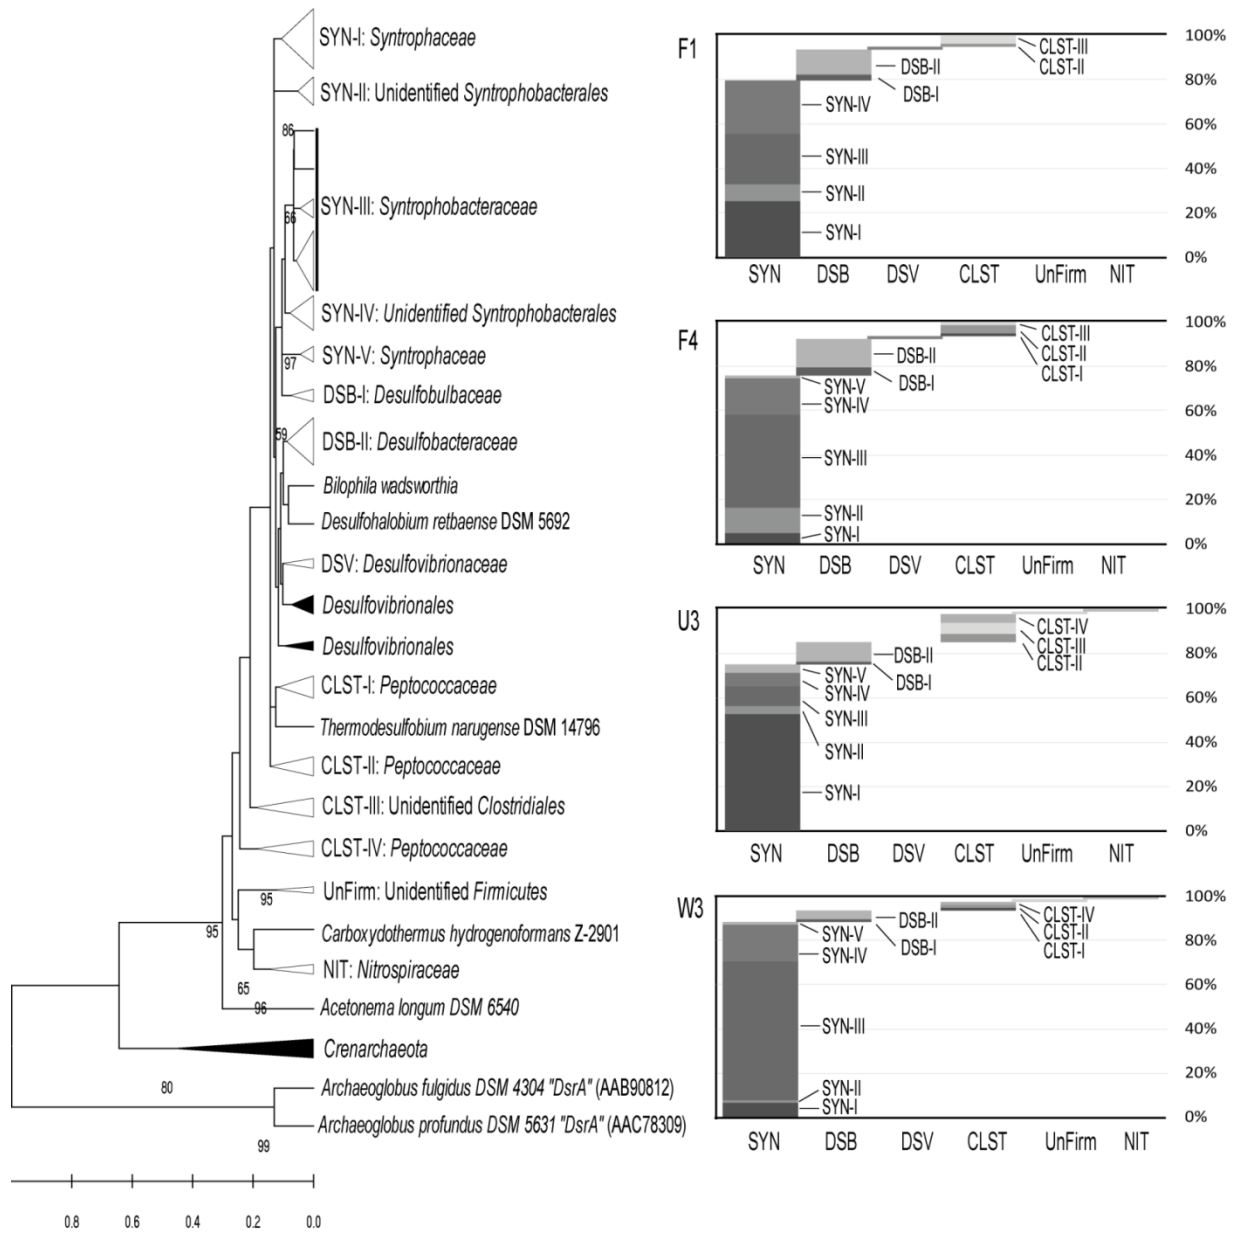

**FIG. S6.** Maximum Likelihood tree representing the phylogeny of *dsrB* transcripts from study sites F1, F4, U3 and W3. Deduced amino acid sequences from *dsrB* transcripts were used for constructing this tree. Bootstrap values of  $\geq 50\%$  from 1000 re-assemblages were placed at branch points. The relative percentage of clades generated from the ML tree and were presented in the stacked column graphs.

## References

1. Steinberg LM, Regan JM. 2009. *mcrA*-Targeted Real-Time Quantitative PCR Method To Examine Methanogen Communities. *Appl. Environ. Microbiol.* 75:4435-4442.
- 2 Foti M, Sorokin DY, Lomans B, Mussman M, Zacharova EE, Pimenov NV, Kuenen JG, Muyzer G. 2007. Diversity, Activity, and Abundance of Sulfate-Reducing Bacteria in Saline and Hypersaline Soda Lakes. *Appl. Environ. Microbiol.* 73: 2093–2100.
